# Supplementary material for: Low-Abundance Members of the Firmicutes Facilitate Bioremediation of Soil Impacted by Highly Acidic Mine Drainage From the Malanjkhand Copper Project, India
Source: Front Microbiol. 2018 Dec 11;9:2882. doi: 10.3389/fmicb.2018.02882 (PMC6297179; doi:10.3389/fmicb.2018.02882)
Supplement: Supplementary file 4 [file Data_Sheet_2.xlsx]

## Sheet: Top 100 OTUS of 0_Day
Table S2: Taxonomic distribution of top 100 OTUS in 0_Day and their abundance
OTUs	C_6M	H_6M	C+L_6M	0_Day
D_0__Bacteria;D_1__WD272;D_2__uncultured bacterium;D_3__uncultured bacterium;D_4__uncultured bacterium;D_5__uncultured bacterium;D_6__uncultured bacterium	1	257	7	92060
D_0__Bacteria;D_1__Proteobacteria;D_2__Gammaproteobacteria;D_3__Xanthomonadales;D_4__Xanthomonadaceae;D_5__uncultured;D_6__uncultured bacterium	7	18803	7	75704
D_0__Bacteria;D_1__Proteobacteria;D_2__Gammaproteobacteria;D_3__Xanthomonadales;D_4__Xanthomonadaceae;D_5__Metallibacterium	6	752	5	50142
D_0__Bacteria;D_1__Acidobacteria;D_2__Acidobacteria;D_3__Acidobacteriales;D_4__Acidobacteriaceae (Subgroup 1);D_5__uncultured;D_6__uncultured Acidobacteria bacterium	2950	4729	2	23170
D_0__Bacteria;D_1__Chloroflexi;D_2__Ktedonobacteria;D_3__JG30-KF-AS9;D_4__uncultured bacterium;D_5__uncultured bacterium;D_6__uncultured bacterium	74365	19673	5	22423
D_0__Bacteria;D_1__Proteobacteria;D_2__Alphaproteobacteria;D_3__Rhodospirillales;D_4__Acetobacteraceae;D_5__uncultured;D_6__uncultured bacterium	3	1891	7	18385
D_0__Bacteria;D_1__Actinobacteria;D_2__Acidimicrobiia;D_3__Acidimicrobiales;D_4__Acidimicrobiaceae;D_5__Ferrithrix	298	17	2	17451
D_0__Bacteria;D_1__Actinobacteria;D_2__Acidimicrobiia;D_3__Acidimicrobiales;D_4__uncultured;D_5__uncultured bacterium;D_6__uncultured bacterium	0	285	3	14720
D_0__Bacteria;D_1__Proteobacteria;D_2__Gammaproteobacteria;D_3__Chromatiales;D_4__Ectothiorhodospiraceae;D_5__Acidiferrobacter;D_6__uncultured bacterium	1	13	0	11427
D_0__Bacteria;D_1__Acidobacteria;D_2__Acidobacteria;D_3__Acidobacteriales;D_4__Acidobacteriaceae (Subgroup 1);D_5__uncultured	1837	3050	3	9783
D_0__Bacteria;D_1__Actinobacteria;D_2__Acidimicrobiia;D_3__Acidimicrobiales;D_4__uncultured;D_5__uncultured bacterium;D_6__uncultured bacterium	0	396	0	7356
D_0__Bacteria;D_1__Chloroflexi;D_2__Ktedonobacteria;D_3__JG30-KF-AS9;D_4__uncultured bacterium;D_5__uncultured bacterium;D_6__uncultured bacterium	589	6006	1	5830
D_0__Bacteria;D_1__Acidobacteria;D_2__Acidobacteria;D_3__Acidobacteriales;D_4__Acidobacteriaceae (Subgroup 1);D_5__uncultured	1433	44396	6	3465
D_0__Bacteria;D_1__Actinobacteria;D_2__Acidimicrobiia;D_3__Acidimicrobiales;D_4__uncultured	3	3961	1	3105
D_0__Bacteria;D_1__Acidobacteria;D_2__Acidobacteria;D_3__Acidobacteriales;D_4__Acidobacteriaceae (Subgroup 1)	4	418	3	3068
D_0__Bacteria;D_1__Acidobacteria;D_2__Acidobacteria;D_3__Acidobacteriales;D_4__Acidobacteriaceae (Subgroup 1);D_5__Acidobacterium	2	229	0	2916
D_0__Bacteria;D_1__Cyanobacteria;D_2__Chloroplast;D_3__uncultured bacterium;D_4__uncultured bacterium;D_5__uncultured bacterium;D_6__uncultured bacterium	22	290	1	2841
D_0__Bacteria;D_1__Acidobacteria;D_2__Acidobacteria;D_3__Acidobacteriales;D_4__Acidobacteriaceae (Subgroup 1);D_5__Telmatobacter;D_6__uncultured bacterium	680	8363	0	2542
D_0__Bacteria;D_1__Actinobacteria;D_2__Actinobacteria;D_3__Frankiales;D_4__Acidothermaceae;D_5__Acidothermus	39	5397	1	2305
D_0__Bacteria;D_1__Proteobacteria;D_2__Alphaproteobacteria;D_3__Rhizobiales;D_4__Rhizobiaceae;D_5__Rhizobium;D_6__uncultured bacterium	13	190	33	2271
D_0__Bacteria;D_1__Proteobacteria;D_2__Gammaproteobacteria;D_3__Xanthomonadales;D_4__Xanthomonadaceae;D_5__Rhodanobacter;D_6__uncultured bacterium	0	0	1	2061
D_0__Bacteria;D_1__Proteobacteria;D_2__Gammaproteobacteria;D_3__Xanthomonadales;D_4__Nevskiaceae;D_5__Alkanibacter;D_6__uncultured bacterium	0	1	0	2057
D_0__Bacteria;D_1__Proteobacteria;D_2__Gammaproteobacteria;D_3__Xanthomonadales;D_4__Xanthomonadaceae;D_5__uncultured;D_6__uncultured bacterium	0	721	1	2037
D_0__Bacteria;D_1__Proteobacteria;D_2__Gammaproteobacteria;D_3__Xanthomonadales;D_4__uncultured;D_5__uncultured bacterium;D_6__uncultured bacterium	0	1242	1	2012
D_0__Bacteria;D_1__Proteobacteria;D_2__Gammaproteobacteria;D_3__Xanthomonadales;D_4__Xanthomonadaceae	0	18	0	1868
D_0__Bacteria;D_1__WD272;D_2__uncultured bacterium;D_3__uncultured bacterium;D_4__uncultured bacterium;D_5__uncultured bacterium;D_6__uncultured bacterium	0	7	1	1806
D_0__Bacteria;D_1__Chloroflexi;D_2__KD4-96;D_3__uncultured bacterium;D_4__uncultured bacterium;D_5__uncultured bacterium;D_6__uncultured bacterium	12266	27596	12	1718
D_0__Bacteria;D_1__Candidate division OD1;D_2__uncultured bacterium;D_3__uncultured bacterium;D_4__uncultured bacterium;D_5__uncultured bacterium;D_6__uncultured bacterium	0	0	0	1549
NA	1	80	1	1434
D_0__Bacteria;D_1__Planctomycetes;D_2__Phycisphaerae;D_3__CPla-3 termite group;D_4__uncultured bacterium;D_5__uncultured bacterium;D_6__uncultured bacterium	0	27	0	1347
D_0__Bacteria;D_1__Actinobacteria;D_2__Acidimicrobiia;D_3__Acidimicrobiales;D_4__uncultured;D_5__uncultured bacterium;D_6__uncultured bacterium	0	94	0	1332
D_0__Bacteria;D_1__Proteobacteria;D_2__Gammaproteobacteria;D_3__Xanthomonadales;D_4__Xanthomonadaceae;D_5__Metallibacterium	0	8	0	1176
D_0__Bacteria;D_1__Chloroflexi;D_2__Ktedonobacteria;D_3__JG30-KF-AS9;D_4__uncultured bacterium;D_5__uncultured bacterium;D_6__uncultured bacterium	2119	291	0	1170
D_0__Bacteria;D_1__Chloroflexi;D_2__Ktedonobacteria;D_3__JG30-KF-AS9;D_4__uncultured bacterium;D_5__uncultured bacterium;D_6__uncultured bacterium	9	4534	1	1136
D_0__Bacteria;D_1__Actinobacteria;D_2__Thermoleophilia;D_3__Solirubrobacterales;D_4__Conexibacteraceae;D_5__Conexibacter;D_6__uncultured bacterium	16	216	5	1081
D_0__Bacteria;D_1__Proteobacteria;D_2__Betaproteobacteria;D_3__TRA3-20;D_4__uncultured bacterium;D_5__uncultured bacterium;D_6__uncultured bacterium	0	19	0	1048
D_0__Bacteria;D_1__Proteobacteria;D_2__Alphaproteobacteria;D_3__Rhodospirillales;D_4__Acetobacteraceae;D_5__uncultured	0	90	0	1045
D_0__Bacteria;D_1__Proteobacteria;D_2__Betaproteobacteria;D_3__Burkholderiales;D_4__Burkholderiales Incertae Sedis;D_5__Thiomonas	6	4	0	1039
D_0__Bacteria;D_1__Proteobacteria;D_2__Gammaproteobacteria;D_3__Xanthomonadales;D_4__Xanthomonadaceae	0	19	0	1027
D_0__Bacteria;D_1__WD272;D_2__uncultured bacterium;D_3__uncultured bacterium;D_4__uncultured bacterium;D_5__uncultured bacterium;D_6__uncultured bacterium	0	0	0	940
D_0__Bacteria;D_1__Acidobacteria;D_2__Acidobacteria;D_3__Acidobacteriales;D_4__Acidobacteriaceae (Subgroup 1);D_5__Telmatobacter;D_6__uncultured bacterium	69	224	0	904
D_0__Bacteria;D_1__Proteobacteria;D_2__Alphaproteobacteria;D_3__Rhodospirillales;D_4__Acetobacteraceae;D_5__Acidiphilium;D_6__uncultured bacterium	0	1550	0	878
D_0__Bacteria;D_1__Proteobacteria;D_2__Gammaproteobacteria;D_3__Xanthomonadales;D_4__Xanthomonadaceae;D_5__uncultured;D_6__uncultured bacterium	0	0	0	826
D_0__Bacteria;D_1__Proteobacteria;D_2__Alphaproteobacteria;D_3__Rhodospirillales;D_4__Acetobacteraceae;D_5__uncultured	0	26	0	785
D_0__Bacteria;D_1__Proteobacteria;D_2__Betaproteobacteria;D_3__Hydrogenophilales;D_4__Hydrogenophilaceae;D_5__Ferritrophicum;D_6__uncultured bacterium	0	15	0	782
D_0__Bacteria;D_1__Chloroflexi;D_2__Ktedonobacteria;D_3__JG30-KF-AS9;D_4__uncultured bacterium;D_5__uncultured bacterium;D_6__uncultured bacterium	3	179	0	684
D_0__Bacteria;D_1__Proteobacteria;D_2__Gammaproteobacteria;D_3__Xanthomonadales;D_4__uncultured;D_5__uncultured bacterium;D_6__uncultured bacterium	7	1999	0	661
D_0__Bacteria;D_1__Acidobacteria;D_2__Acidobacteria;D_3__Acidobacteriales;D_4__Acidobacteriaceae (Subgroup 1);D_5__uncultured;D_6__uncultured Acidobacteria bacterium	187	1738	0	655
D_0__Bacteria;D_1__WD272;D_2__uncultured bacterium;D_3__uncultured bacterium;D_4__uncultured bacterium;D_5__uncultured bacterium;D_6__uncultured bacterium	0	5	0	629
D_0__Bacteria;D_1__Chloroflexi;D_2__Ktedonobacteria;D_3__JG30-KF-AS9;D_4__uncultured bacterium;D_5__uncultured bacterium;D_6__uncultured bacterium	249	502	1	618
D_0__Bacteria;D_1__Actinobacteria;D_2__Acidimicrobiia;D_3__Acidimicrobiales;D_4__uncultured;D_5__uncultured bacterium;D_6__uncultured bacterium	0	2	0	610
D_0__Bacteria;D_1__Firmicutes;D_2__Bacilli;D_3__Bacillales;D_4__Bacillaceae;D_5__Bacillus;D_6__uncultured bacterium	745	1438	3227	579
D_0__Bacteria;D_1__Chloroflexi;D_2__Ktedonobacteria;D_3__Ktedonobacterales;D_4__HSB OF53-F07;D_5__uncultured bacterium;D_6__uncultured bacterium	0	24	1	550
D_0__Bacteria;D_1__Firmicutes;D_2__Bacilli;D_3__Bacillales;D_4__Alicyclobacillaceae;D_5__Alicyclobacillus	385	850	7	548
D_0__Bacteria;D_1__Proteobacteria;D_2__Gammaproteobacteria;D_3__Xanthomonadales;D_4__Xanthomonadaceae;D_5__Metallibacterium	0	0	0	541
D_0__Bacteria;D_1__Proteobacteria;D_2__Gammaproteobacteria;D_3__Xanthomonadales;D_4__Xanthomonadaceae;D_5__uncultured;D_6__uncultured bacterium	0	217	0	524
D_0__Bacteria;D_1__WD272;D_2__uncultured bacterium;D_3__uncultured bacterium;D_4__uncultured bacterium;D_5__uncultured bacterium;D_6__uncultured bacterium	0	3	0	500
D_0__Bacteria;D_1__WD272;D_2__uncultured bacterium;D_3__uncultured bacterium;D_4__uncultured bacterium;D_5__uncultured bacterium;D_6__uncultured bacterium	0	0	1	495
D_0__Bacteria;D_1__Chloroflexi;D_2__Ktedonobacteria;D_3__JG30-KF-AS9;D_4__uncultured bacterium;D_5__uncultured bacterium;D_6__uncultured bacterium	8	164	1	484
D_0__Bacteria;D_1__Chloroflexi;D_2__TK10;D_3__uncultured bacterium;D_4__uncultured bacterium;D_5__uncultured bacterium;D_6__uncultured bacterium	0	0	0	475
D_0__Bacteria;D_1__Proteobacteria;D_2__Gammaproteobacteria;D_3__Xanthomonadales;D_4__Xanthomonadaceae;D_5__Metallibacterium;D_6__uncultured bacterium	0	4	0	464
D_0__Bacteria;D_1__WD272;D_2__uncultured bacterium;D_3__uncultured bacterium;D_4__uncultured bacterium;D_5__uncultured bacterium;D_6__uncultured bacterium	0	8	0	446
D_0__Bacteria;D_1__Chloroflexi;D_2__Ktedonobacteria;D_3__JG30-KF-AS9;D_4__uncultured bacterium;D_5__uncultured bacterium;D_6__uncultured bacterium	691	94	0	429
D_0__Bacteria;D_1__Planctomycetes;D_2__Planctomycetacia;D_3__Planctomycetales;D_4__Planctomycetaceae;D_5__uncultured;D_6__uncultured planctomycete	1	5	3	427
D_0__Bacteria;D_1__Chloroflexi;D_2__KD4-96	19	1707	1	413
D_0__Bacteria;D_1__Chloroflexi;D_2__Ktedonobacteria;D_3__JG30-KF-AS9;D_4__uncultured bacterium;D_5__uncultured bacterium;D_6__uncultured bacterium	11	2594	1	389
D_0__Bacteria;D_1__WD272;D_2__uncultured bacterium;D_3__uncultured bacterium;D_4__uncultured bacterium;D_5__uncultured bacterium;D_6__uncultured bacterium	0	6	0	388
D_0__Bacteria;D_1__Proteobacteria;D_2__Alphaproteobacteria;D_3__Rhodospirillales;D_4__Acetobacteraceae;D_5__uncultured	3	46	1	384
D_0__Bacteria;D_1__Proteobacteria;D_2__Gammaproteobacteria;D_3__Xanthomonadales;D_4__Nevskiaceae;D_5__Alkanibacter;D_6__uncultured bacterium	0	0	0	383
D_0__Bacteria;D_1__Actinobacteria;D_2__Acidimicrobiia;D_3__Acidimicrobiales;D_4__uncultured;D_5__uncultured bacterium;D_6__uncultured bacterium	0	26	0	382
D_0__Bacteria;D_1__Proteobacteria;D_2__Gammaproteobacteria;D_3__Xanthomonadales;D_4__Xanthomonadaceae;D_5__uncultured;D_6__uncultured bacterium	0	72	0	355
D_0__Bacteria;D_1__Proteobacteria;D_2__Gammaproteobacteria;D_3__Enterobacteriales;D_4__Enterobacteriaceae;D_5__Escherichia-Shigella;D_6__uncultured bacterium	4	31	6	353
D_0__Bacteria;D_1__Chloroflexi;D_2__Ktedonobacteria;D_3__JG30-KF-AS9;D_4__uncultured bacterium;D_5__uncultured bacterium;D_6__uncultured bacterium	3	157	0	348
D_0__Bacteria;D_1__Actinobacteria;D_2__Acidimicrobiia;D_3__Acidimicrobiales;D_4__uncultured;D_5__uncultured bacterium;D_6__uncultured bacterium	0	0	0	334
D_0__Bacteria;D_1__Acidobacteria;D_2__Acidobacteria;D_3__Acidobacteriales;D_4__Acidobacteriaceae (Subgroup 1);D_5__uncultured;D_6__uncultured Acidobacteria bacterium	26	7137	1	329
D_0__Bacteria;D_1__Proteobacteria;D_2__Gammaproteobacteria;D_3__Xanthomonadales;D_4__Xanthomonadaceae	0	9	0	325
D_0__Bacteria;D_1__WD272;D_2__uncultured bacterium;D_3__uncultured bacterium;D_4__uncultured bacterium;D_5__uncultured bacterium;D_6__uncultured bacterium	0	0	0	315
D_0__Bacteria;D_1__Cyanobacteria;D_2__Chloroplast;D_3__uncultured bacterium;D_4__uncultured bacterium;D_5__uncultured bacterium;D_6__uncultured bacterium	0	7	0	312
D_0__Bacteria;D_1__Proteobacteria;D_2__Gammaproteobacteria;D_3__Xanthomonadales;D_4__Xanthomonadaceae;D_5__Metallibacterium	0	8	0	304
D_0__Bacteria;D_1__Acidobacteria;D_2__Acidobacteria;D_3__Acidobacteriales;D_4__Acidobacteriaceae (Subgroup 1);D_5__uncultured;D_6__uncultured Acidobacteria bacterium	17	75	0	299
D_0__Bacteria;D_1__Proteobacteria;D_2__Gammaproteobacteria;D_3__Xanthomonadales;D_4__Xanthomonadaceae;D_5__uncultured;D_6__uncultured bacterium	0	56	0	299
D_0__Bacteria;D_1__Acidobacteria;D_2__Acidobacteria;D_3__Acidobacteriales;D_4__Acidobacteriaceae (Subgroup 1);D_5__uncultured;D_6__uncultured Acidobacteria bacterium	0	0	0	298
D_0__Bacteria;D_1__Actinobacteria;D_2__Thermoleophilia;D_3__Solirubrobacterales;D_4__YNPFFP1;D_5__uncultured bacterium;D_6__uncultured bacterium	2	207	1	281
D_0__Bacteria;D_1__WD272;D_2__uncultured bacterium;D_3__uncultured bacterium;D_4__uncultured bacterium;D_5__uncultured bacterium;D_6__uncultured bacterium	0	0	1	280
D_0__Bacteria;D_1__Proteobacteria;D_2__Alphaproteobacteria;D_3__Rhodospirillales;D_4__Acetobacteraceae;D_5__Acidisoma	0	1	0	276
D_0__Bacteria;D_1__Proteobacteria;D_2__Gammaproteobacteria;D_3__Xanthomonadales;D_4__Xanthomonadaceae;D_5__uncultured;D_6__uncultured bacterium	0	81	0	273
D_0__Bacteria;D_1__Proteobacteria;D_2__Alphaproteobacteria;D_3__Rhodospirillales;D_4__DA111;D_5__uncultured bacterium;D_6__uncultured bacterium	0	23	0	270
D_0__Bacteria;D_1__Proteobacteria;D_2__Alphaproteobacteria;D_3__Rhodospirillales;D_4__Acetobacteraceae;D_5__uncultured	0	3	0	269
D_0__Bacteria;D_1__Proteobacteria;D_2__Alphaproteobacteria;D_3__Rhodospirillales;D_4__Acetobacteraceae;D_5__Acidiphilium;D_6__uncultured bacterium	0	0	2	261
D_0__Bacteria;D_1__Chloroflexi;D_2__Ktedonobacteria;D_3__JG30-KF-AS9;D_4__uncultured bacterium;D_5__uncultured bacterium;D_6__uncultured bacterium	535	178	0	258
D_0__Bacteria;D_1__Actinobacteria;D_2__Acidimicrobiia;D_3__Acidimicrobiales;D_4__uncultured;D_5__uncultured bacterium;D_6__uncultured bacterium	0	4	0	255
D_0__Bacteria;D_1__Proteobacteria;D_2__Gammaproteobacteria;D_3__Xanthomonadales;D_4__Xanthomonadaceae	0	2	0	254
D_0__Bacteria;D_1__WD272;D_2__uncultured bacterium;D_3__uncultured bacterium;D_4__uncultured bacterium;D_5__uncultured bacterium;D_6__uncultured bacterium	0	0	0	251
D_0__Bacteria;D_1__Proteobacteria;D_2__Gammaproteobacteria;D_3__Xanthomonadales;D_4__Xanthomonadaceae;D_5__uncultured;D_6__uncultured bacterium	0	10	0	250
D_0__Bacteria;D_1__Acidobacteria;D_2__Acidobacteria;D_3__Acidobacteriales;D_4__Acidobacteriaceae (Subgroup 1);D_5__uncultured;D_6__uncultured Acidobacteria bacterium	28	107	0	249
D_0__Bacteria;D_1__Proteobacteria;D_2__Gammaproteobacteria;D_3__Xanthomonadales;D_4__Xanthomonadaceae;D_5__Metallibacterium	0	4	0	245
D_0__Bacteria;D_1__Actinobacteria;D_2__Acidimicrobiia;D_3__Acidimicrobiales;D_4__Acidimicrobiaceae;D_5__Ferrithrix;D_6__uncultured bacterium	0	0	0	245
D_0__Bacteria;D_1__Actinobacteria;D_2__Acidimicrobiia;D_3__Acidimicrobiales;D_4__uncultured;D_5__uncultured bacterium;D_6__uncultured bacterium	0	0	0	244
D_0__Bacteria;D_1__Proteobacteria;D_2__Gammaproteobacteria;D_3__Xanthomonadales;D_4__Xanthomonadaceae;D_5__uncultured;D_6__uncultured bacterium	0	56	0	242
D_0__Bacteria;D_1__Proteobacteria;D_2__Gammaproteobacteria;D_3__Xanthomonadales;D_4__Xanthomonadaceae	0	2	0	227

## Sheet: Top 100 OTUs of H_6M
Table S2: Taxonomic distribution of top 100 OTUS in H_6M and their abundance
OTUs	C_6M	H_6M	C+L_6M	0_Day
D_0__Bacteria;D_1__Verrucomicrobia;D_2__OPB35 soil group	0	45544	0	5
D_0__Bacteria;D_1__Acidobacteria;D_2__Acidobacteria;D_3__Acidobacteriales;D_4__Acidobacteriaceae (Subgroup 1);D_5__uncultured	1433	44396	6	3465
D_0__Bacteria;D_1__Chlorobi;D_2__Ignavibacteria;D_3__Ignavibacteriales;D_4__BSV26;D_5__uncultured bacterium;D_6__uncultured bacterium	0	32756	0	7
D_0__Bacteria;D_1__Proteobacteria;D_2__Betaproteobacteria;D_3__Nitrosomonadales;D_4__Gallionellaceae;D_5__Sideroxydans;D_6__uncultured bacterium	2	30216	1	20
D_0__Bacteria;D_1__Chloroflexi;D_2__KD4-96;D_3__uncultured bacterium;D_4__uncultured bacterium;D_5__uncultured bacterium;D_6__uncultured bacterium	12266	27596	12	1718
D_0__Bacteria;D_1__Acidobacteria;D_2__Acidobacteria;D_3__Acidobacteriales;D_4__Acidobacteriaceae (Subgroup 1);D_5__uncultured;D_6__uncultured bacterium	0	23809	1	105
D_0__Bacteria;D_1__Chloroflexi;D_2__Ktedonobacteria;D_3__JG30-KF-AS9;D_4__uncultured bacterium;D_5__uncultured bacterium;D_6__uncultured bacterium	74365	19673	5	22423
D_0__Bacteria;D_1__Proteobacteria;D_2__Gammaproteobacteria;D_3__Xanthomonadales;D_4__Xanthomonadaceae;D_5__uncultured;D_6__uncultured bacterium	7	18803	7	75704
D_0__Bacteria;D_1__Proteobacteria;D_2__Deltaproteobacteria;D_3__Myxococcales;D_4__Cystobacteraceae;D_5__Anaeromyxobacter;D_6__uncultured bacterium	0	14581	2	29
D_0__Bacteria;D_1__Proteobacteria;D_2__Deltaproteobacteria;D_3__Myxococcales;D_4__Cystobacteraceae;D_5__Anaeromyxobacter;D_6__uncultured bacterium	1	11140	5	14
D_0__Bacteria;D_1__Firmicutes;D_2__Clostridia;D_3__Clostridiales;D_4__Family XVII;D_5__uncultured;D_6__uncultured bacterium	3728	10649	0	16
D_0__Bacteria;D_1__Acidobacteria;D_2__Acidobacteria;D_3__Acidobacteriales;D_4__Acidobacteriaceae (Subgroup 1);D_5__Telmatobacter;D_6__uncultured bacterium	680	8363	0	2542
D_0__Bacteria;D_1__Acidobacteria;D_2__Acidobacteria;D_3__Acidobacteriales;D_4__Acidobacteriaceae (Subgroup 1);D_5__uncultured;D_6__uncultured Acidobacteria bacterium	26	7137	1	329
D_0__Bacteria;D_1__Acidobacteria;D_2__Acidobacteria;D_3__Acidobacteriales;D_4__Acidobacteriaceae (Subgroup 1);D_5__uncultured;D_6__uncultured bacterium	0	6367	0	29
D_0__Bacteria;D_1__Chloroflexi;D_2__Ktedonobacteria;D_3__JG30-KF-AS9;D_4__uncultured bacterium;D_5__uncultured bacterium;D_6__uncultured bacterium	589	6006	1	5830
D_0__Bacteria;D_1__Actinobacteria;D_2__Actinobacteria;D_3__Frankiales;D_4__Acidothermaceae;D_5__Acidothermus	39	5397	1	2305
D_0__Bacteria;D_1__Acidobacteria;D_2__Acidobacteria;D_3__Acidobacteriales;D_4__Acidobacteriaceae (Subgroup 1);D_5__uncultured;D_6__uncultured Acidobacteria bacterium	2950	4729	2	23170
D_0__Bacteria;D_1__Chloroflexi;D_2__Ktedonobacteria;D_3__JG30-KF-AS9;D_4__uncultured bacterium;D_5__uncultured bacterium;D_6__uncultured bacterium	9	4534	1	1136
D_0__Bacteria;D_1__Acidobacteria;D_2__Acidobacteria;D_3__Subgroup 13;D_4__uncultured bacterium;D_5__uncultured bacterium;D_6__uncultured bacterium	0	4070	0	54
D_0__Bacteria;D_1__Actinobacteria;D_2__Acidimicrobiia;D_3__Acidimicrobiales;D_4__uncultured	3	3961	1	3105
D_0__Bacteria;D_1__Proteobacteria;D_2__Gammaproteobacteria;D_3__NKB5	1	3892	0	20
D_0__Bacteria;D_1__Acidobacteria;D_2__Acidobacteria;D_3__Subgroup 3;D_4__Unknown Family;D_5__Bryobacter;D_6__uncultured bacterium	0	3110	0	5
D_0__Bacteria;D_1__Acidobacteria;D_2__Acidobacteria;D_3__Acidobacteriales;D_4__Acidobacteriaceae (Subgroup 1);D_5__uncultured	1837	3050	3	9783
D_0__Bacteria;D_1__Acidobacteria;D_2__Acidobacteria;D_3__Acidobacteriales;D_4__Acidobacteriaceae (Subgroup 1);D_5__uncultured	332	2904	0	97
D_0__Bacteria;D_1__Proteobacteria;D_2__Deltaproteobacteria;D_3__GR-WP33-30;D_4__uncultured bacterium;D_5__uncultured bacterium;D_6__uncultured bacterium	0	2786	0	86
D_0__Bacteria;D_1__Proteobacteria;D_2__Betaproteobacteria;D_3__Nitrosomonadales;D_4__Gallionellaceae;D_5__Sideroxydans;D_6__uncultured bacterium	0	2629	0	0
D_0__Bacteria;D_1__Chloroflexi;D_2__Ktedonobacteria;D_3__JG30-KF-AS9;D_4__uncultured bacterium;D_5__uncultured bacterium;D_6__uncultured bacterium	11	2594	1	389
D_0__Archaea;D_1__Thaumarchaeota;D_2__South African Gold Mine Gp 1(SAGMCG-1);D_3__uncultured archaeon;D_4__uncultured archaeon;D_5__uncultured archaeon;D_6__uncultured archaeon	6	2367	0	45
D_0__Bacteria;D_1__Proteobacteria;D_2__Deltaproteobacteria;D_3__GR-WP33-30;D_4__uncultured bacterium;D_5__uncultured bacterium;D_6__uncultured bacterium	0	2127	0	2
D_0__Bacteria;D_1__Planctomycetes;D_2__Planctomycetacia;D_3__Planctomycetales;D_4__Planctomycetaceae;D_5__Isosphaera;D_6__uncultured bacterium	652	2107	0	93
D_0__Bacteria;D_1__Proteobacteria;D_2__Gammaproteobacteria;D_3__Xanthomonadales;D_4__uncultured;D_5__uncultured bacterium;D_6__uncultured bacterium	7	1999	0	661
D_0__Bacteria;D_1__Proteobacteria;D_2__Alphaproteobacteria;D_3__Rhodospirillales;D_4__Acetobacteraceae;D_5__uncultured;D_6__uncultured bacterium	3	1891	7	18385
D_0__Bacteria;D_1__Actinobacteria;D_2__Acidimicrobiia;D_3__Acidimicrobiales;D_4__uncultured	94	1819	0	196
D_0__Bacteria;D_1__Acidobacteria;D_2__Acidobacteria;D_3__Acidobacteriales;D_4__Acidobacteriaceae (Subgroup 1);D_5__uncultured;D_6__uncultured Acidobacteria bacterium	187	1738	0	655
D_0__Bacteria;D_1__Chloroflexi;D_2__KD4-96	19	1707	1	413
D_0__Bacteria;D_1__Proteobacteria;D_2__Betaproteobacteria;D_3__Nitrosomonadales;D_4__Gallionellaceae;D_5__Sideroxydans;D_6__uncultured bacterium	0	1605	0	3
D_0__Bacteria;D_1__Actinobacteria;D_2__Actinobacteria;D_3__Frankiales;D_4__Acidothermaceae;D_5__Acidothermus;D_6__uncultured bacterium	4	1580	1	120
D_0__Bacteria;D_1__Proteobacteria;D_2__Deltaproteobacteria;D_3__Myxococcales;D_4__Cystobacteraceae;D_5__Anaeromyxobacter;D_6__uncultured bacterium	0	1571	0	2
D_0__Bacteria;D_1__Proteobacteria;D_2__Alphaproteobacteria;D_3__Rhodospirillales;D_4__Acetobacteraceae;D_5__Acidiphilium;D_6__uncultured bacterium	0	1550	0	878
D_0__Bacteria;D_1__Acidobacteria;D_2__Acidobacteria;D_3__Acidobacteriales;D_4__Acidobacteriaceae (Subgroup 1);D_5__uncultured;D_6__uncultured bacterium	0	1474	0	3
D_0__Bacteria;D_1__Firmicutes;D_2__Bacilli;D_3__Bacillales;D_4__Bacillaceae;D_5__Bacillus;D_6__uncultured bacterium	745	1438	3227	579
D_0__Bacteria;D_1__Proteobacteria;D_2__Gammaproteobacteria;D_3__Xanthomonadales;D_4__uncultured;D_5__uncultured bacterium;D_6__uncultured bacterium	0	1406	1	25
D_0__Bacteria;D_1__Proteobacteria;D_2__Gammaproteobacteria;D_3__Xanthomonadales;D_4__uncultured;D_5__uncultured bacterium;D_6__uncultured bacterium	0	1242	1	2012
D_0__Bacteria;D_1__Planctomycetes;D_2__Planctomycetacia;D_3__Planctomycetales;D_4__Planctomycetaceae	6	1221	0	8
D_0__Bacteria;D_1__Proteobacteria;D_2__Betaproteobacteria;D_3__Nitrosomonadales;D_4__Gallionellaceae;D_5__Sideroxydans;D_6__uncultured bacterium	0	1184	0	0
D_0__Bacteria;D_1__Acidobacteria;D_2__Acidobacteria;D_3__Acidobacteriales;D_4__Acidobacteriaceae (Subgroup 1);D_5__Telmatobacter	65	1153	0	71
D_0__Bacteria;D_1__Acidobacteria;D_2__Acidobacteria;D_3__Subgroup 2;D_4__uncultured bacterium;D_5__uncultured bacterium;D_6__uncultured bacterium	0	1149	0	6
D_0__Bacteria;D_1__Acidobacteria;D_2__Acidobacteria;D_3__Subgroup 13;D_4__uncultured bacterium;D_5__uncultured bacterium;D_6__uncultured bacterium	0	1067	0	0
D_0__Bacteria;D_1__Planctomycetes;D_2__Planctomycetacia;D_3__Planctomycetales;D_4__Planctomycetaceae;D_5__Isosphaera;D_6__uncultured bacterium	1	1063	4	194
D_0__Bacteria;D_1__Proteobacteria;D_2__Deltaproteobacteria;D_3__GR-WP33-30;D_4__uncultured bacterium;D_5__uncultured bacterium;D_6__uncultured bacterium	0	1054	0	11
D_0__Bacteria;D_1__Proteobacteria;D_2__Betaproteobacteria;D_3__Nitrosomonadales;D_4__Gallionellaceae;D_5__Sideroxydans;D_6__uncultured bacterium	0	885	0	1
D_0__Bacteria;D_1__Firmicutes;D_2__Bacilli;D_3__Bacillales;D_4__Alicyclobacillaceae;D_5__Alicyclobacillus	385	850	7	548
D_0__Bacteria;D_1__Proteobacteria;D_2__Betaproteobacteria;D_3__Nitrosomonadales;D_4__Gallionellaceae;D_5__Sideroxydans;D_6__uncultured bacterium	0	847	0	0
D_0__Bacteria;D_1__Proteobacteria;D_2__Gammaproteobacteria;D_3__Xanthomonadales;D_4__Xanthomonadaceae;D_5__Metallibacterium	6	752	5	50142
D_0__Bacteria;D_1__Proteobacteria;D_2__Gammaproteobacteria;D_3__Xanthomonadales;D_4__Xanthomonadaceae;D_5__uncultured;D_6__uncultured bacterium	0	721	1	2037
D_0__Bacteria;D_1__Chloroflexi;D_2__KD4-96;D_3__uncultured bacterium;D_4__uncultured bacterium;D_5__uncultured bacterium;D_6__uncultured bacterium	320	699	0	84
D_0__Bacteria;D_1__Proteobacteria;D_2__Betaproteobacteria;D_3__Nitrosomonadales;D_4__Gallionellaceae;D_5__Sideroxydans;D_6__uncultured bacterium	0	636	0	0
D_0__Bacteria;D_1__Proteobacteria;D_2__Betaproteobacteria;D_3__Nitrosomonadales;D_4__Gallionellaceae;D_5__Sideroxydans;D_6__uncultured bacterium	0	609	0	0
D_0__Bacteria;D_1__Firmicutes;D_2__Clostridia;D_3__Clostridiales;D_4__Family XVII;D_5__uncultured;D_6__uncultured bacterium	65	575	0	0
D_0__Bacteria;D_1__Firmicutes;D_2__Clostridia;D_3__Clostridiales;D_4__Peptococcaceae;D_5__uncultured;D_6__uncultured bacterium	16	560	19	16
D_0__Bacteria;D_1__Chloroflexi;D_2__KD4-96;D_3__uncultured bacterium;D_4__uncultured bacterium;D_5__uncultured bacterium;D_6__uncultured bacterium	13	556	0	120
D_0__Bacteria;D_1__Verrucomicrobia;D_2__OPB35 soil group	0	552	0	0
D_0__Bacteria;D_1__Actinobacteria;D_2__Coriobacteriia;D_3__Coriobacteriales;D_4__Coriobacteriaceae;D_5__uncultured	2218	550	34686	35
NA	0	525	0	0
D_0__Bacteria;D_1__Acidobacteria;D_2__Acidobacteria;D_3__Acidobacteriales;D_4__Acidobacteriaceae (Subgroup 1);D_5__uncultured	1	514	0	23
D_0__Bacteria;D_1__Acidobacteria;D_2__Acidobacteria;D_3__Subgroup 2;D_4__uncultured bacterium;D_5__uncultured bacterium;D_6__uncultured bacterium	0	514	2	4
D_0__Bacteria;D_1__Firmicutes;D_2__Clostridia;D_3__Clostridiales;D_4__Ruminococcaceae;D_5__uncultured	9	509	3	19
D_0__Bacteria;D_1__Proteobacteria;D_2__Betaproteobacteria;D_3__Nitrosomonadales;D_4__Gallionellaceae;D_5__Sideroxydans;D_6__uncultured bacterium	0	506	0	0
D_0__Bacteria;D_1__Chloroflexi;D_2__Ktedonobacteria;D_3__JG30-KF-AS9;D_4__uncultured bacterium;D_5__uncultured bacterium;D_6__uncultured bacterium	249	502	1	618
D_0__Bacteria;D_1__Proteobacteria;D_2__Alphaproteobacteria;D_3__Rhodospirillales;D_4__Rhodospirillaceae;D_5__Telmatospirillum;D_6__uncultured bacterium	0	501	0	12
D_0__Bacteria;D_1__Actinobacteria;D_2__Thermoleophilia;D_3__Gaiellales;D_4__uncultured;D_5__uncultured bacterium;D_6__uncultured bacterium	2	500	0	101
D_0__Bacteria;D_1__Chloroflexi;D_2__KD4-96;D_3__uncultured bacterium;D_4__uncultured bacterium;D_5__uncultured bacterium;D_6__uncultured bacterium	109	499	0	40
D_0__Bacteria;D_1__Acidobacteria;D_2__Acidobacteria;D_3__Acidobacteriales;D_4__Acidobacteriaceae (Subgroup 1);D_5__Telmatobacter;D_6__uncultured Acidobacteria bacterium	0	494	0	2
D_0__Bacteria;D_1__Actinobacteria;D_2__Actinobacteria;D_3__Micrococcales;D_4__Cellulomonadaceae;D_5__Cellulomonas	2862	488	13	41
D_0__Bacteria;D_1__Proteobacteria;D_2__Alphaproteobacteria;D_3__Rhizobiales;D_4__Bradyrhizobiaceae;D_5__Bradyrhizobium	0	465	0	70
D_0__Bacteria;D_1__Firmicutes;D_2__Clostridia;D_3__Clostridiales;D_4__Ruminococcaceae;D_5__uncultured;D_6__uncultured bacterium	786	453	332	18
D_0__Bacteria;D_1__Acidobacteria;D_2__Acidobacteria;D_3__Acidobacteriales;D_4__Acidobacteriaceae (Subgroup 1);D_5__uncultured;D_6__uncultured Acidobacteria bacterium	4	428	0	11
D_0__Bacteria;D_1__Firmicutes;D_2__Bacilli;D_3__Bacillales;D_4__Bacillaceae;D_5__Bacillus	257	425	38	194
D_0__Bacteria;D_1__Acidobacteria;D_2__Acidobacteria;D_3__Acidobacteriales;D_4__Acidobacteriaceae (Subgroup 1)	4	418	3	3068
D_0__Bacteria;D_1__Firmicutes;D_2__Clostridia;D_3__Clostridiales;D_4__Family XVII;D_5__uncultured;D_6__uncultured bacterium	28	413	0	0
D_0__Bacteria;D_1__Acidobacteria;D_2__Acidobacteria;D_3__Acidobacteriales;D_4__Acidobacteriaceae (Subgroup 1);D_5__uncultured;D_6__uncultured bacterium	76	400	0	217
D_0__Bacteria;D_1__Firmicutes;D_2__Clostridia;D_3__Clostridiales;D_4__Peptococcaceae;D_5__Desulfosporosinus	90	398	9199	135
D_0__Bacteria;D_1__Actinobacteria;D_2__Acidimicrobiia;D_3__Acidimicrobiales;D_4__uncultured;D_5__uncultured bacterium;D_6__uncultured bacterium	0	396	0	7356
D_0__Bacteria;D_1__Proteobacteria;D_2__Betaproteobacteria;D_3__Nitrosomonadales;D_4__Gallionellaceae;D_5__Sideroxydans;D_6__uncultured bacterium	0	390	0	1
D_0__Bacteria;D_1__Proteobacteria;D_2__Betaproteobacteria	0	389	0	105
D_0__Bacteria;D_1__Proteobacteria;D_2__Deltaproteobacteria;D_3__Myxococcales;D_4__Cystobacteraceae;D_5__Anaeromyxobacter;D_6__uncultured bacterium	0	388	0	2
D_0__Bacteria;D_1__Chloroflexi;D_2__TK10;D_3__uncultured bacterium;D_4__uncultured bacterium;D_5__uncultured bacterium;D_6__uncultured bacterium	0	360	0	0
D_0__Bacteria;D_1__TM6;D_2__uncultured bacterium;D_3__uncultured bacterium;D_4__uncultured bacterium;D_5__uncultured bacterium;D_6__uncultured bacterium	4	353	3	6
D_0__Bacteria;D_1__Firmicutes;D_2__Clostridia;D_3__Clostridiales;D_4__Family XVIII;D_5__uncultured;D_6__uncultured bacterium	30358	346	0	30
D_0__Bacteria;D_1__Actinobacteria;D_2__Thermoleophilia;D_3__Gaiellales;D_4__uncultured;D_5__uncultured bacterium;D_6__uncultured bacterium	0	345	0	111
D_0__Bacteria;D_1__Actinobacteria;D_2__Acidimicrobiia;D_3__Acidimicrobiales;D_4__uncultured	8	343	0	21
D_0__Bacteria;D_1__Chloroflexi;D_2__KD4-96;D_3__uncultured bacterium;D_4__uncultured bacterium;D_5__uncultured bacterium;D_6__uncultured bacterium	45	337	0	47
D_0__Bacteria;D_1__Chloroflexi;D_2__KD4-96;D_3__uncultured bacterium;D_4__uncultured bacterium;D_5__uncultured bacterium;D_6__uncultured bacterium	109	330	0	21
D_0__Bacteria;D_1__Proteobacteria;D_2__Betaproteobacteria;D_3__Nitrosomonadales;D_4__Gallionellaceae;D_5__Sideroxydans;D_6__uncultured bacterium	0	327	0	0
D_0__Bacteria;D_1__Proteobacteria;D_2__Betaproteobacteria;D_3__Nitrosomonadales;D_4__Gallionellaceae;D_5__Sideroxydans;D_6__uncultured bacterium	0	321	0	0
D_0__Bacteria;D_1__Proteobacteria;D_2__Betaproteobacteria;D_3__Nitrosomonadales;D_4__Gallionellaceae;D_5__Sideroxydans;D_6__uncultured bacterium	0	319	0	0
D_0__Bacteria;D_1__Chloroflexi;D_2__JG30-KF-CM66;D_3__uncultured bacterium;D_4__uncultured bacterium;D_5__uncultured bacterium;D_6__uncultured bacterium	0	316	0	20
D_0__Bacteria;D_1__Firmicutes;D_2__Clostridia;D_3__Clostridiales;D_4__Clostridiaceae 1;D_5__Clostridium sensu stricto 1	152	310	2794	95
D_0__Bacteria;D_1__Proteobacteria;D_2__Betaproteobacteria;D_3__Nitrosomonadales;D_4__Gallionellaceae;D_5__Sideroxydans;D_6__uncultured bacterium	0	309	0	0
D_0__Bacteria;D_1__Chlorobi;D_2__Ignavibacteria;D_3__Ignavibacteriales;D_4__BSV26;D_5__uncultured bacterium;D_6__uncultured bacterium	0	306	0	0

## Sheet: Top 100 OTUS of C_6M
Table S2: Taxonomic distribution of top 100 OTUS in C_6M and their abundance
OTUs	C_6M	H_6M	C+L_6M	0_Day
D_0__Bacteria;D_1__Firmicutes;D_2__Clostridia;D_3__Clostridiales;D_4__Family XVIII;D_5__uncultured;D_6__uncultured bacterium	91082	0	0	0
D_0__Bacteria;D_1__Chloroflexi;D_2__Ktedonobacteria;D_3__JG30-KF-AS9;D_4__uncultured bacterium;D_5__uncultured bacterium;D_6__uncultured bacterium	74365	19673	5	22423
D_0__Bacteria;D_1__Acidobacteria;D_2__Acidobacteria;D_3__Subgroup 3;D_4__AKIW659;D_5__uncultured bacterium;D_6__uncultured bacterium	37340	145	38	51
D_0__Bacteria;D_1__Firmicutes;D_2__Clostridia;D_3__Clostridiales;D_4__Ruminococcaceae;D_5__Incertae Sedis;D_6__uncultured bacterium	30784	78	4010	20
D_0__Bacteria;D_1__Firmicutes;D_2__Clostridia;D_3__Clostridiales;D_4__Family XVIII;D_5__uncultured;D_6__uncultured bacterium	30358	346	0	30
D_0__Bacteria;D_1__Proteobacteria;D_2__Gammaproteobacteria;D_3__Enterobacteriales;D_4__Enterobacteriaceae;D_5__Enterobacter	18754	1	4	1
D_0__Bacteria;D_1__Proteobacteria;D_2__Betaproteobacteria;D_3__Burkholderiales;D_4__Comamonadaceae	17310	1	3	1
D_0__Bacteria;D_1__Firmicutes;D_2__Negativicutes;D_3__Selenomonadales;D_4__Veillonellaceae;D_5__uncultured;D_6__Veillonellaceae bacterium ALE	14570	0	0	2
D_0__Bacteria;D_1__Chloroflexi;D_2__KD4-96;D_3__uncultured bacterium;D_4__uncultured bacterium;D_5__uncultured bacterium;D_6__uncultured bacterium	12266	27596	12	1718
D_0__Bacteria;D_1__Firmicutes;D_2__Clostridia;D_3__Clostridiales;D_4__Peptococcaceae;D_5__Desulfurispora;D_6__uncultured bacterium	9046	243	934	47
D_0__Bacteria;D_1__Firmicutes;D_2__Clostridia;D_3__Clostridiales;D_4__Lachnospiraceae;D_5__uncultured	6506	10	220	1
D_0__Archaea;D_1__Euryarchaeota;D_2__Thermoplasmata;D_3__Thermoplasmatales;D_4__Thermoplasmataceae;D_5__Thermoplasma;D_6__uncultured archaeon	6432	0	0	0
D_0__Bacteria;D_1__Proteobacteria;D_2__Gammaproteobacteria;D_3__Acidithiobacillales;D_4__Acidithiobacillaceae;D_5__Acidithiobacillus;D_6__uncultured bacterium	5537	0	0	11
D_0__Bacteria;D_1__Firmicutes;D_2__Clostridia;D_3__Clostridiales;D_4__Peptococcaceae;D_5__Thermincola	5141	210	1216	20
D_0__Bacteria;D_1__Firmicutes;D_2__Clostridia;D_3__Clostridiales;D_4__Lachnospiraceae;D_5__uncultured	5089	64	12699	25
D_0__Bacteria;D_1__Firmicutes;D_2__Clostridia;D_3__Clostridiales;D_4__Family XVII;D_5__uncultured;D_6__uncultured bacterium	3728	10649	0	16
D_0__Bacteria;D_1__Firmicutes;D_2__Clostridia;D_3__Clostridiales;D_4__vadinBB60;D_5__uncultured bacterium;D_6__uncultured bacterium	3569	202	1163	14
D_0__Bacteria;D_1__Acidobacteria;D_2__Acidobacteria;D_3__Acidobacteriales;D_4__Acidobacteriaceae (Subgroup 1);D_5__uncultured;D_6__uncultured Acidobacteria bacterium	2950	4729	2	23170
D_0__Bacteria;D_1__Actinobacteria;D_2__Actinobacteria;D_3__Micrococcales;D_4__Cellulomonadaceae;D_5__Cellulomonas	2862	488	13	41
D_0__Bacteria;D_1__Firmicutes;D_2__Clostridia;D_3__Clostridiales;D_4__Family XVIII;D_5__uncultured;D_6__uncultured bacterium	2358	0	0	0
D_0__Bacteria;D_1__Firmicutes;D_2__Clostridia;D_3__Clostridiales;D_4__Family XVIII;D_5__uncultured;D_6__uncultured bacterium	2231	1	0	0
D_0__Bacteria;D_1__Actinobacteria;D_2__Coriobacteriia;D_3__Coriobacteriales;D_4__Coriobacteriaceae;D_5__uncultured	2218	550	34686	35
D_0__Bacteria;D_1__Chloroflexi;D_2__Ktedonobacteria;D_3__JG30-KF-AS9;D_4__uncultured bacterium;D_5__uncultured bacterium;D_6__uncultured bacterium	2119	291	0	1170
D_0__Bacteria;D_1__Firmicutes;D_2__Clostridia;D_3__Clostridiales;D_4__Christensenellaceae;D_5__uncultured;D_6__uncultured bacterium	2093	57	16774	14
D_0__Bacteria;D_1__Firmicutes;D_2__Clostridia;D_3__Clostridiales;D_4__Family XVIII;D_5__uncultured;D_6__uncultured bacterium	2061	1	0	0
D_0__Bacteria;D_1__Acidobacteria;D_2__Acidobacteria;D_3__Acidobacteriales;D_4__Acidobacteriaceae (Subgroup 1);D_5__uncultured	1837	3050	3	9783
D_0__Bacteria;D_1__Firmicutes;D_2__Clostridia;D_3__Clostridiales;D_4__Family XIII;D_5__uncultured;D_6__uncultured bacterium	1522	103	325	19
D_0__Bacteria;D_1__Proteobacteria;D_2__Betaproteobacteria;D_3__Burkholderiales;D_4__Burkholderiaceae;D_5__Ralstonia;D_6__uncultured bacterium	1502	11	3	3
D_0__Bacteria;D_1__Acidobacteria;D_2__Acidobacteria;D_3__Acidobacteriales;D_4__Acidobacteriaceae (Subgroup 1);D_5__uncultured	1433	44396	6	3465
D_0__Bacteria;D_1__Proteobacteria;D_2__Gammaproteobacteria;D_3__Acidithiobacillales;D_4__Acidithiobacillaceae;D_5__Acidithiobacillus	1419	0	0	0
D_0__Bacteria;D_1__Firmicutes;D_2__Clostridia;D_3__Clostridiales;D_4__Peptococcaceae;D_5__Dehalobacter	1404	15	4784	2
D_0__Bacteria;D_1__Firmicutes;D_2__Negativicutes;D_3__Selenomonadales;D_4__Veillonellaceae;D_5__uncultured;D_6__uncultured bacterium	1341	83	11890	11
D_0__Bacteria;D_1__Firmicutes;D_2__Clostridia;D_3__Clostridiales;D_4__Ruminococcaceae;D_5__Incertae Sedis;D_6__uncultured bacterium	1237	4	361	1
D_0__Bacteria;D_1__Proteobacteria;D_2__Deltaproteobacteria;D_3__Bdellovibrionales;D_4__Bacteriovoracaceae;D_5__uncultured;D_6__uncultured bacterium	1124	0	0	45
D_0__Bacteria;D_1__Firmicutes;D_2__Clostridia;D_3__Clostridiales;D_4__Peptococcaceae;D_5__uncultured;D_6__uncultured bacterium	1120	0	77	0
D_0__Bacteria;D_1__Firmicutes;D_2__Clostridia;D_3__D8A-2;D_4__uncultured Symbiobacterium sp.;D_5__uncultured Symbiobacterium sp.;D_6__uncultured Symbiobacterium sp.	1062	18	224	7
D_0__Bacteria;D_1__Firmicutes;D_2__Bacilli;D_3__Bacillales;D_4__Alicyclobacillaceae;D_5__Alicyclobacillus	1039	22	2	25
D_0__Bacteria;D_1__Acidobacteria;D_2__Acidobacteria;D_3__Subgroup 3;D_4__Unknown Family;D_5__Candidatus Solibacter;D_6__uncultured bacterium	1024	229	2	0
D_0__Bacteria;D_1__Firmicutes;D_2__Clostridia;D_3__Clostridiales;D_4__Ruminococcaceae;D_5__Incertae Sedis;D_6__uncultured bacterium	949	75	656	24
D_0__Bacteria;D_1__Firmicutes;D_2__Clostridia;D_3__Clostridiales;D_4__Ruminococcaceae;D_5__Incertae Sedis;D_6__uncultured bacterium	907	134	917	59
D_0__Bacteria;D_1__Firmicutes;D_2__Clostridia;D_3__Clostridiales;D_4__Ruminococcaceae;D_5__uncultured;D_6__uncultured bacterium	868	5	2374	0
D_0__Bacteria;D_1__Firmicutes;D_2__Negativicutes;D_3__Selenomonadales;D_4__Veillonellaceae;D_5__uncultured;D_6__uncultured bacterium	794	18	108	1
D_0__Bacteria;D_1__Firmicutes;D_2__Clostridia;D_3__Clostridiales;D_4__Family XVII;D_5__uncultured;D_6__uncultured bacterium	793	32	0	3
D_0__Bacteria;D_1__Firmicutes;D_2__Clostridia;D_3__Clostridiales;D_4__Ruminococcaceae;D_5__uncultured;D_6__uncultured bacterium	786	453	332	18
D_0__Bacteria;D_1__Firmicutes;D_2__Clostridia;D_3__Clostridiales;D_4__Ruminococcaceae;D_5__uncultured;D_6__uncultured bacterium	776	0	113	0
D_0__Bacteria;D_1__Firmicutes;D_2__Clostridia;D_3__Clostridiales;D_4__Lachnospiraceae;D_5__uncultured	773	21	581	4
D_0__Bacteria;D_1__Firmicutes;D_2__Clostridia;D_3__Clostridiales;D_4__Ruminococcaceae;D_5__Incertae Sedis;D_6__uncultured bacterium	757	129	3057	29
D_0__Bacteria;D_1__Firmicutes;D_2__Bacilli;D_3__Bacillales;D_4__Bacillaceae;D_5__Bacillus;D_6__uncultured bacterium	745	1438	3227	579
D_0__Bacteria;D_1__Firmicutes;D_2__OPB54;D_3__uncultured bacterium;D_4__uncultured bacterium;D_5__uncultured bacterium;D_6__uncultured bacterium	730	284	1834	34
NA	713	0	0	0
D_0__Bacteria;D_1__Chloroflexi;D_2__Ktedonobacteria;D_3__JG30-KF-AS9;D_4__uncultured bacterium;D_5__uncultured bacterium;D_6__uncultured bacterium	691	94	0	429
D_0__Bacteria;D_1__Acidobacteria;D_2__Acidobacteria;D_3__Acidobacteriales;D_4__Acidobacteriaceae (Subgroup 1);D_5__Telmatobacter;D_6__uncultured bacterium	680	8363	0	2542
D_0__Bacteria;D_1__Firmicutes;D_2__Clostridia;D_3__Clostridiales;D_4__Family XVII;D_5__uncultured;D_6__uncultured bacterium	658	6	0	11
D_0__Bacteria;D_1__Planctomycetes;D_2__Planctomycetacia;D_3__Planctomycetales;D_4__Planctomycetaceae;D_5__Isosphaera;D_6__uncultured bacterium	652	2107	0	93
D_0__Bacteria;D_1__Firmicutes;D_2__Clostridia;D_3__Clostridiales;D_4__Christensenellaceae;D_5__uncultured;D_6__uncultured bacterium	640	31	660	7
D_0__Bacteria;D_1__Firmicutes;D_2__Clostridia;D_3__Clostridiales;D_4__Family XVIII;D_5__uncultured;D_6__uncultured bacterium	595	0	0	0
D_0__Bacteria;D_1__Firmicutes;D_2__Clostridia;D_3__Clostridiales;D_4__Family XVII;D_5__Sulfobacillus;D_6__uncultured Sulfobacillus sp.	594	5	0	1
D_0__Bacteria;D_1__Chloroflexi;D_2__Ktedonobacteria;D_3__JG30-KF-AS9;D_4__uncultured bacterium;D_5__uncultured bacterium;D_6__uncultured bacterium	589	6006	1	5830
D_0__Bacteria;D_1__Firmicutes;D_2__Clostridia;D_3__Clostridiales;D_4__Family XVIII;D_5__uncultured;D_6__uncultured bacterium	581	0	0	0
D_0__Bacteria;D_1__Firmicutes;D_2__Clostridia;D_3__Clostridiales;D_4__Ruminococcaceae;D_5__Incertae Sedis;D_6__uncultured bacterium	572	13	1	4
D_0__Bacteria;D_1__Proteobacteria;D_2__Betaproteobacteria;D_3__Burkholderiales;D_4__Comamonadaceae	566	0	0	0
D_0__Bacteria;D_1__Firmicutes;D_2__Clostridia;D_3__Clostridiales;D_4__Family XVIII;D_5__uncultured;D_6__uncultured bacterium	564	0	0	0
D_0__Bacteria;D_1__Chloroflexi;D_2__Ktedonobacteria;D_3__JG30-KF-AS9;D_4__uncultured bacterium;D_5__uncultured bacterium;D_6__uncultured bacterium	535	178	0	258
D_0__Bacteria;D_1__Firmicutes;D_2__Clostridia;D_3__Clostridiales;D_4__Family XVIII;D_5__uncultured;D_6__uncultured bacterium	522	1	0	0
D_0__Bacteria;D_1__Proteobacteria;D_2__Alphaproteobacteria;D_3__Rhizobiales	498	161	0	1
D_0__Bacteria;D_1__Firmicutes;D_2__Clostridia;D_3__Clostridiales;D_4__Ruminococcaceae;D_5__uncultured;D_6__uncultured bacterium	495	1	4	0
D_0__Bacteria;D_1__Firmicutes;D_2__Clostridia;D_3__Clostridiales;D_4__Family XVIII;D_5__uncultured;D_6__uncultured bacterium	479	25	0	0
D_0__Bacteria;D_1__Proteobacteria;D_2__Betaproteobacteria;D_3__Burkholderiales;D_4__Burkholderiaceae;D_5__Burkholderia	464	1	0	3
D_0__Bacteria;D_1__Firmicutes;D_2__OPB54;D_3__uncultured bacterium;D_4__uncultured bacterium;D_5__uncultured bacterium;D_6__uncultured bacterium	445	0	23	0
D_0__Bacteria;D_1__Firmicutes;D_2__Clostridia;D_3__Clostridiales;D_4__Christensenellaceae;D_5__uncultured;D_6__uncultured bacterium	429	0	2423	0
D_0__Bacteria;D_1__Firmicutes;D_2__Clostridia;D_3__Clostridiales;D_4__Family XVII;D_5__uncultured;D_6__uncultured bacterium	420	77	0	3
D_0__Bacteria;D_1__Armatimonadetes;D_2__uncultured bacterium;D_3__uncultured bacterium;D_4__uncultured bacterium;D_5__uncultured bacterium;D_6__uncultured bacterium	397	0	0	1
D_0__Bacteria;D_1__Firmicutes;D_2__Clostridia;D_3__Clostridiales;D_4__Family XVIII;D_5__uncultured;D_6__uncultured bacterium	395	0	0	0
D_0__Bacteria;D_1__Firmicutes;D_2__Bacilli;D_3__Bacillales;D_4__Alicyclobacillaceae;D_5__Alicyclobacillus	385	850	7	548
D_0__Bacteria;D_1__Firmicutes;D_2__Clostridia;D_3__Clostridiales;D_4__Ruminococcaceae;D_5__Incertae Sedis;D_6__uncultured bacterium	385	0	107	0
D_0__Bacteria;D_1__Firmicutes;D_2__Clostridia;D_3__Clostridiales;D_4__Family XVIII;D_5__uncultured;D_6__uncultured bacterium	384	0	0	0
D_0__Bacteria;D_1__Firmicutes;D_2__Clostridia;D_3__Clostridiales;D_4__Family XVIII;D_5__uncultured;D_6__uncultured bacterium	382	9	0	0
D_0__Bacteria;D_1__Firmicutes;D_2__Clostridia;D_3__Clostridiales;D_4__Family XVIII;D_5__uncultured;D_6__uncultured bacterium	376	1	0	1
D_0__Bacteria;D_1__Armatimonadetes;D_2__Chthonomonadetes;D_3__Chthonomonadales;D_4__uncultured bacterium;D_5__uncultured bacterium;D_6__uncultured bacterium	367	0	1	0
D_0__Bacteria;D_1__Firmicutes;D_2__Clostridia;D_3__Clostridiales;D_4__Family XVIII;D_5__uncultured;D_6__uncultured bacterium	366	6	0	0
D_0__Bacteria;D_1__Firmicutes;D_2__Clostridia;D_3__Clostridiales;D_4__Christensenellaceae;D_5__uncultured;D_6__uncultured bacterium	363	12	252	2
D_0__Bacteria;D_1__Firmicutes;D_2__Clostridia;D_3__Clostridiales;D_4__Lachnospiraceae;D_5__uncultured	363	2	87	0
D_0__Bacteria;D_1__Firmicutes;D_2__Clostridia;D_3__Clostridiales;D_4__Christensenellaceae;D_5__uncultured;D_6__uncultured bacterium	356	21	450	5
D_0__Bacteria;D_1__Proteobacteria;D_2__Gammaproteobacteria;D_3__Enterobacteriales;D_4__Enterobacteriaceae;D_5__Kluyvera	355	0	0	0
D_0__Bacteria;D_1__Chloroflexi;D_2__Ktedonobacteria;D_3__JG30-KF-AS9;D_4__uncultured bacterium;D_5__uncultured bacterium;D_6__uncultured bacterium	352	102	0	193
D_0__Bacteria;D_1__Firmicutes;D_2__Clostridia;D_3__Clostridiales;D_4__Ruminococcaceae;D_5__Incertae Sedis;D_6__uncultured bacterium	352	1	120	0
D_0__Bacteria;D_1__Acidobacteria;D_2__Acidobacteria;D_3__Acidobacteriales;D_4__Acidobacteriaceae (Subgroup 1);D_5__uncultured;D_6__uncultured bacterium	347	18	0	0
D_0__Bacteria;D_1__Chloroflexi;D_2__Ktedonobacteria;D_3__JG30-KF-AS9;D_4__uncultured bacterium;D_5__uncultured bacterium;D_6__uncultured bacterium	337	52	0	59
D_0__Bacteria;D_1__Firmicutes;D_2__Negativicutes;D_3__Selenomonadales;D_4__Veillonellaceae;D_5__uncultured;D_6__Veillonellaceae bacterium ALE	335	0	0	0
D_0__Bacteria;D_1__Firmicutes;D_2__Clostridia;D_3__Clostridiales;D_4__vadinBB60;D_5__uncultured bacterium;D_6__uncultured bacterium	333	6	80	3
D_0__Bacteria;D_1__Acidobacteria;D_2__Acidobacteria;D_3__Acidobacteriales;D_4__Acidobacteriaceae (Subgroup 1);D_5__uncultured	332	2904	0	97
D_0__Bacteria;D_1__Chloroflexi;D_2__KD4-96;D_3__uncultured bacterium;D_4__uncultured bacterium;D_5__uncultured bacterium;D_6__uncultured bacterium	320	699	0	84
D_0__Bacteria;D_1__Actinobacteria;D_2__Acidimicrobiia;D_3__Acidimicrobiales;D_4__Acidimicrobiaceae;D_5__Ferrithrix	298	17	2	17451
D_0__Bacteria;D_1__Firmicutes;D_2__Clostridia;D_3__Clostridiales;D_4__Ruminococcaceae;D_5__Incertae Sedis	295	1	162	0
D_0__Bacteria;D_1__Firmicutes;D_2__Clostridia;D_3__Clostridiales;D_4__Ruminococcaceae;D_5__Incertae Sedis;D_6__uncultured bacterium	290	0	52	0
D_0__Bacteria;D_1__Firmicutes;D_2__Clostridia;D_3__Clostridiales;D_4__Family XVIII;D_5__uncultured;D_6__uncultured bacterium	286	6	0	1
D_0__Bacteria;D_1__Firmicutes;D_2__Clostridia;D_3__Clostridiales;D_4__Peptococcaceae;D_5__Desulfurispora;D_6__uncultured bacterium	286	1	3	0
D_0__Bacteria;D_1__Firmicutes;D_2__Clostridia;D_3__Clostridiales;D_4__Ruminococcaceae;D_5__Incertae Sedis;D_6__uncultured bacterium	283	9	93	4
NA	272	0	781	0
D_0__Bacteria;D_1__Firmicutes;D_2__Clostridia;D_3__Clostridiales;D_4__Gracilibacteraceae	272	0	445	0

## Sheet: Top 100 OTUS of C+L_6M
Table S2: Taxonomic distribution of top 100 OTUS in C+L_6M and their abundance
OTUs	C_6M	H_6M	C+L_6M	0_Day
NA	0	1	122757	0
D_0__Bacteria;D_1__Planctomycetes;D_2__Phycisphaerae;D_3__MSBL9;D_4__uncultured bacterium;D_5__uncultured bacterium;D_6__uncultured bacterium	0	18	36855	10
D_0__Bacteria;D_1__Actinobacteria;D_2__Coriobacteriia;D_3__Coriobacteriales;D_4__Coriobacteriaceae;D_5__uncultured	2218	550	34686	35
D_0__Bacteria;D_1__Firmicutes;D_2__OPB54;D_3__uncultured bacterium;D_4__uncultured bacterium;D_5__uncultured bacterium;D_6__uncultured bacterium	3	7	18158	0
D_0__Bacteria;D_1__Firmicutes;D_2__Clostridia;D_3__Clostridiales;D_4__Christensenellaceae;D_5__uncultured;D_6__uncultured bacterium	2093	57	16774	14
D_0__Bacteria;D_1__Firmicutes;D_2__Clostridia;D_3__Clostridiales;D_4__Gracilibacteraceae	5	7	14564	1
D_0__Bacteria;D_1__Firmicutes;D_2__Clostridia;D_3__Clostridiales;D_4__Lachnospiraceae;D_5__uncultured	5089	64	12699	25
D_0__Bacteria;D_1__Firmicutes;D_2__Clostridia;D_3__Clostridiales;D_4__Clostridiaceae 1;D_5__Clostridium sensu stricto 12	158	53	12004	21
D_0__Bacteria;D_1__Firmicutes;D_2__Negativicutes;D_3__Selenomonadales;D_4__Veillonellaceae;D_5__uncultured;D_6__uncultured bacterium	1341	83	11890	11
D_0__Bacteria;D_1__Firmicutes;D_2__Clostridia;D_3__Clostridiales;D_4__Peptococcaceae;D_5__Thermincola;D_6__uncultured bacterium	0	1	10630	0
D_0__Bacteria;D_1__Firmicutes;D_2__Clostridia;D_3__Clostridiales;D_4__Peptococcaceae;D_5__Desulfosporosinus	90	398	9199	135
D_0__Bacteria;D_1__Firmicutes;D_2__Clostridia;D_3__Clostridiales;D_4__Gracilibacteraceae;D_5__Lutispora;D_6__uncultured bacterium	16	30	8124	15
D_0__Bacteria;D_1__Firmicutes;D_2__Clostridia;D_3__Clostridiales;D_4__Ruminococcaceae;D_5__Incertae Sedis;D_6__uncultured bacterium	119	24	6000	1
D_0__Bacteria;D_1__Firmicutes;D_2__Clostridia;D_3__Clostridiales;D_4__Peptococcaceae;D_5__Desulfitobacterium	9	4	5941	2
D_0__Bacteria;D_1__Firmicutes;D_2__Clostridia;D_3__Clostridiales;D_4__Peptococcaceae;D_5__Dehalobacter	1404	15	4784	2
D_0__Bacteria;D_1__Firmicutes;D_2__Clostridia;D_3__Clostridiales;D_4__Ruminococcaceae;D_5__Incertae Sedis;D_6__uncultured bacterium	30784	78	4010	20
D_0__Bacteria;D_1__Firmicutes;D_2__Clostridia;D_3__Clostridiales;D_4__vadinBB60;D_5__uncultured bacterium;D_6__uncultured bacterium	144	5	3875	2
D_0__Bacteria;D_1__Firmicutes;D_2__Clostridia;D_3__D8A-2;D_4__uncultured bacterium;D_5__uncultured bacterium;D_6__uncultured bacterium	0	1	3239	0
D_0__Bacteria;D_1__Firmicutes;D_2__Bacilli;D_3__Bacillales;D_4__Bacillaceae;D_5__Bacillus;D_6__uncultured bacterium	745	1438	3227	579
D_0__Bacteria;D_1__Firmicutes;D_2__Clostridia;D_3__Clostridiales;D_4__Ruminococcaceae;D_5__Incertae Sedis;D_6__uncultured bacterium	757	129	3057	29
D_0__Bacteria;D_1__Firmicutes;D_2__Clostridia;D_3__Clostridiales;D_4__Clostridiaceae 1;D_5__Clostridium sensu stricto 1	152	310	2794	95
D_0__Bacteria;D_1__Firmicutes;D_2__Clostridia;D_3__Clostridiales;D_4__Gracilibacteraceae	0	2	2757	0
D_0__Bacteria;D_1__Firmicutes;D_2__Bacilli;D_3__Bacillales;D_4__Bacillaceae	7	38	2731	14
D_0__Bacteria;D_1__Firmicutes;D_2__Clostridia;D_3__Clostridiales;D_4__Peptococcaceae;D_5__Desulfosporosinus	14	46	2553	16
D_0__Bacteria;D_1__Firmicutes;D_2__Clostridia;D_3__Clostridiales;D_4__Christensenellaceae;D_5__uncultured;D_6__uncultured bacterium	429	0	2423	0
D_0__Bacteria;D_1__Firmicutes;D_2__Clostridia;D_3__Clostridiales;D_4__Ruminococcaceae;D_5__uncultured;D_6__uncultured bacterium	868	5	2374	0
D_0__Bacteria;D_1__Tenericutes;D_2__Mollicutes;D_3__NB1-n;D_4__uncultured bacterium;D_5__uncultured bacterium;D_6__uncultured bacterium	1	1	2025	0
D_0__Bacteria;D_1__Firmicutes;D_2__Clostridia;D_3__Clostridiales;D_4__Clostridiaceae 1	0	0	1843	0
D_0__Bacteria;D_1__Firmicutes;D_2__OPB54;D_3__uncultured bacterium;D_4__uncultured bacterium;D_5__uncultured bacterium;D_6__uncultured bacterium	730	284	1834	34
NA	0	0	1752	0
D_0__Bacteria;D_1__Firmicutes;D_2__Clostridia;D_3__Clostridiales;D_4__Family XIII;D_5__uncultured	12	1	1652	0
NA	0	0	1527	0
D_0__Bacteria;D_1__Firmicutes;D_2__Negativicutes;D_3__Selenomonadales;D_4__Veillonellaceae;D_5__uncultured;D_6__uncultured bacterium	114	0	1332	0
D_0__Bacteria;D_1__Firmicutes;D_2__Clostridia;D_3__Clostridiales;D_4__Peptococcaceae;D_5__Thermincola	5141	210	1216	20
D_0__Bacteria;D_1__Firmicutes;D_2__Clostridia;D_3__Clostridiales;D_4__Ruminococcaceae;D_5__uncultured;D_6__uncultured bacterium	10	0	1202	0
D_0__Bacteria;D_1__Firmicutes;D_2__Clostridia;D_3__Clostridiales;D_4__Peptococcaceae;D_5__Desulfosporosinus;D_6__uncultured bacterium	16	52	1187	15
D_0__Bacteria;D_1__Firmicutes;D_2__Clostridia;D_3__Clostridiales;D_4__vadinBB60;D_5__uncultured bacterium;D_6__uncultured bacterium	3569	202	1163	14
D_0__Bacteria;D_1__Firmicutes;D_2__Clostridia;D_3__Clostridiales;D_4__Peptococcaceae;D_5__Desulfitibacter;D_6__uncultured bacterium	1	2	1160	0
D_0__Bacteria;D_1__Firmicutes;D_2__Clostridia;D_3__Clostridiales;D_4__Ruminococcaceae;D_5__Incertae Sedis;D_6__uncultured bacterium	211	154	1087	49
NA	0	0	1035	0
D_0__Bacteria;D_1__Firmicutes;D_2__Clostridia;D_3__Clostridiales;D_4__Peptococcaceae;D_5__Desulfurispora;D_6__uncultured bacterium	9046	243	934	47
D_0__Bacteria;D_1__Firmicutes;D_2__Clostridia;D_3__Clostridiales;D_4__Lachnospiraceae;D_5__Incertae Sedis	176	6	929	1
D_0__Bacteria;D_1__Firmicutes;D_2__Clostridia;D_3__Clostridiales;D_4__Ruminococcaceae;D_5__Incertae Sedis;D_6__uncultured bacterium	907	134	917	59
D_0__Bacteria;D_1__Planctomycetes;D_2__Phycisphaerae;D_3__MSBL9;D_4__uncultured bacterium;D_5__uncultured bacterium;D_6__uncultured bacterium	0	0	852	0
D_0__Bacteria;D_1__Firmicutes;D_2__Clostridia;D_3__Clostridiales;D_4__Ruminococcaceae;D_5__Incertae Sedis;D_6__uncultured bacterium	252	22	840	10
D_0__Bacteria;D_1__Firmicutes;D_2__Clostridia;D_3__Clostridiales;D_4__vadinBB60;D_5__uncultured bacterium;D_6__uncultured bacterium	80	1	837	0
D_0__Bacteria;D_1__Planctomycetes;D_2__Phycisphaerae;D_3__WD2101 soil group;D_4__uncultured bacterium;D_5__uncultured bacterium;D_6__uncultured bacterium	0	0	805	0
NA	0	0	786	0
D_0__Bacteria;D_1__Firmicutes;D_2__Clostridia;D_3__Clostridiales;D_4__Christensenellaceae;D_5__uncultured;D_6__uncultured bacterium	22	0	782	1
NA	272	0	781	0
D_0__Bacteria;D_1__Firmicutes;D_2__Clostridia;D_3__Clostridiales;D_4__Peptococcaceae;D_5__Thermincola;D_6__uncultured bacterium	9	4	744	0
D_0__Bacteria;D_1__Firmicutes;D_2__Clostridia;D_3__Clostridiales;D_4__Ruminococcaceae;D_5__Papillibacter;D_6__uncultured bacterium	176	13	672	3
D_0__Bacteria;D_1__Firmicutes;D_2__Clostridia;D_3__Clostridiales;D_4__Christensenellaceae;D_5__uncultured;D_6__uncultured bacterium	640	31	660	7
D_0__Bacteria;D_1__Firmicutes;D_2__Clostridia;D_3__Clostridiales;D_4__Ruminococcaceae;D_5__Incertae Sedis;D_6__uncultured bacterium	949	75	656	24
D_0__Bacteria;D_1__Firmicutes;D_2__OPB54;D_3__uncultured bacterium;D_4__uncultured bacterium;D_5__uncultured bacterium;D_6__uncultured bacterium	0	0	640	0
D_0__Bacteria;D_1__Firmicutes;D_2__Negativicutes;D_3__Selenomonadales;D_4__Veillonellaceae;D_5__uncultured	56	1	639	0
NA	0	1	624	0
D_0__Bacteria;D_1__Firmicutes;D_2__Clostridia;D_3__Clostridiales;D_4__Lachnospiraceae;D_5__uncultured	773	21	581	4
D_0__Bacteria;D_1__Actinobacteria;D_2__Coriobacteriia;D_3__Coriobacteriales;D_4__Coriobacteriaceae;D_5__uncultured	1	0	566	0
D_0__Bacteria;D_1__Firmicutes;D_2__OPB54;D_3__uncultured bacterium;D_4__uncultured bacterium;D_5__uncultured bacterium;D_6__uncultured bacterium	14	8	563	1
D_0__Bacteria;D_1__Firmicutes;D_2__OPB54;D_3__uncultured bacterium;D_4__uncultured bacterium;D_5__uncultured bacterium;D_6__uncultured bacterium	0	0	548	0
D_0__Bacteria;D_1__Firmicutes;D_2__Clostridia;D_3__Clostridiales;D_4__Lachnospiraceae;D_5__uncultured	73	1	544	0
D_0__Bacteria;D_1__Firmicutes;D_2__Clostridia;D_3__Clostridiales;D_4__Peptococcaceae;D_5__uncultured	0	0	529	0
D_0__Bacteria;D_1__Firmicutes;D_2__Clostridia;D_3__Clostridiales;D_4__Peptococcaceae;D_5__Desulfosporosinus	0	14	514	9
NA	0	0	500	0
D_0__Bacteria;D_1__Firmicutes;D_2__Clostridia;D_3__Clostridiales;D_4__Clostridiaceae 1;D_5__Clostridium sensu stricto 12;D_6__uncultured bacterium	5	0	490	0
D_0__Bacteria;D_1__Firmicutes;D_2__OPB54;D_3__uncultured bacterium;D_4__uncultured bacterium;D_5__uncultured bacterium;D_6__uncultured bacterium	0	0	474	0
D_0__Bacteria;D_1__Firmicutes;D_2__Clostridia;D_3__Clostridiales;D_4__Ruminococcaceae;D_5__Incertae Sedis;D_6__uncultured bacterium	63	84	471	9
D_0__Bacteria;D_1__Firmicutes;D_2__Clostridia;D_3__Halanaerobiales;D_4__Halobacteroidaceae;D_5__uncultured;D_6__uncultured Halanaerobiales bacterium	0	0	453	0
D_0__Bacteria;D_1__Firmicutes;D_2__Clostridia;D_3__Clostridiales;D_4__Christensenellaceae;D_5__uncultured;D_6__uncultured bacterium	356	21	450	5
D_0__Bacteria;D_1__Firmicutes;D_2__Clostridia;D_3__Clostridiales;D_4__Gracilibacteraceae	272	0	445	0
D_0__Bacteria;D_1__Actinobacteria;D_2__Coriobacteriia;D_3__Coriobacteriales;D_4__Coriobacteriaceae;D_5__uncultured	22	0	437	0
D_0__Bacteria;D_1__Firmicutes;D_2__Clostridia;D_3__Clostridiales;D_4__Ruminococcaceae;D_5__Incertae Sedis	252	67	412	10
D_0__Bacteria;D_1__Firmicutes;D_2__Clostridia;D_3__Clostridiales;D_4__Christensenellaceae;D_5__uncultured;D_6__uncultured bacterium	0	0	408	0
D_0__Bacteria;D_1__Firmicutes;D_2__Clostridia;D_3__Clostridiales;D_4__Gracilibacteraceae	0	0	404	0
D_0__Bacteria;D_1__Firmicutes;D_2__Clostridia;D_3__Clostridiales;D_4__Peptococcaceae;D_5__Thermincola;D_6__uncultured bacterium	0	0	397	0
D_0__Bacteria;D_1__Firmicutes;D_2__Clostridia;D_3__Clostridiales;D_4__Syntrophomonadaceae;D_5__Syntrophomonas	0	51	394	1
NA	0	0	389	0
D_0__Bacteria;D_1__Planctomycetes;D_2__Phycisphaerae;D_3__MSBL9;D_4__uncultured planctomycete;D_5__uncultured planctomycete;D_6__uncultured planctomycete	0	0	380	0
D_0__Bacteria;D_1__Firmicutes;D_2__Negativicutes;D_3__Selenomonadales;D_4__Veillonellaceae;D_5__uncultured;D_6__uncultured bacterium	45	1	372	0
D_0__Bacteria;D_1__Firmicutes;D_2__Clostridia;D_3__Clostridiales;D_4__Ruminococcaceae;D_5__Anaerotruncus;D_6__uncultured bacterium	2	0	366	0
D_0__Bacteria;D_1__Firmicutes;D_2__OPB54;D_3__uncultured bacterium;D_4__uncultured bacterium;D_5__uncultured bacterium;D_6__uncultured bacterium	1	12	365	0
D_0__Bacteria;D_1__Firmicutes;D_2__Clostridia;D_3__Clostridiales;D_4__Ruminococcaceae;D_5__Incertae Sedis;D_6__uncultured bacterium	1237	4	361	1
NA	0	0	358	0
D_0__Bacteria;D_1__Firmicutes;D_2__Clostridia;D_3__D8A-2;D_4__uncultured Symbiobacterium sp.;D_5__uncultured Symbiobacterium sp.;D_6__uncultured Symbiobacterium sp.	0	5	354	2
D_0__Bacteria;D_1__Firmicutes;D_2__Clostridia;D_3__Clostridiales;D_4__Peptococcaceae;D_5__Desulfosporosinus;D_6__uncultured bacterium	2	10	351	6
D_0__Bacteria;D_1__Firmicutes;D_2__Negativicutes;D_3__Selenomonadales;D_4__Veillonellaceae;D_5__uncultured;D_6__uncultured bacterium	1	0	343	0
D_0__Bacteria;D_1__Firmicutes;D_2__Clostridia;D_3__Clostridiales;D_4__Ruminococcaceae;D_5__uncultured;D_6__uncultured bacterium	35	1	342	0
D_0__Bacteria;D_1__Firmicutes;D_2__Clostridia;D_3__Clostridiales;D_4__Gracilibacteraceae	1	4	334	0
D_0__Bacteria;D_1__Firmicutes;D_2__Clostridia;D_3__Clostridiales;D_4__Ruminococcaceae;D_5__uncultured;D_6__uncultured bacterium	786	453	332	18
D_0__Bacteria;D_1__Firmicutes;D_2__Clostridia;D_3__Clostridiales;D_4__Family XIII;D_5__uncultured;D_6__uncultured bacterium	1522	103	325	19
D_0__Bacteria;D_1__Actinobacteria;D_2__Coriobacteriia;D_3__Coriobacteriales;D_4__Coriobacteriaceae;D_5__uncultured;D_6__uncultured bacterium	15	0	313	0
D_0__Bacteria;D_1__Firmicutes;D_2__Clostridia;D_3__Clostridiales;D_4__Ruminococcaceae;D_5__Incertae Sedis;D_6__uncultured bacterium	0	0	310	0
D_0__Bacteria;D_1__Firmicutes;D_2__Clostridia;D_3__Clostridiales;D_4__Peptococcaceae;D_5__Desulfosporosinus;D_6__Desulfosporosinus acidiphilus SJ4	2	8	309	2
D_0__Bacteria;D_1__Firmicutes;D_2__Clostridia;D_3__Clostridiales;D_4__Christensenellaceae;D_5__uncultured;D_6__uncultured bacterium	6	22	293	1
D_0__Bacteria;D_1__Firmicutes;D_2__Clostridia;D_3__Clostridiales;D_4__Clostridiaceae 1;D_5__Oxobacter;D_6__uncultured bacterium	4	3	291	1
D_0__Bacteria;D_1__Firmicutes;D_2__Clostridia;D_3__Clostridiales;D_4__Family XII;D_5__uncultured;D_6__uncultured bacterium	0	1	290	0
NA	0	0	287	0
D_0__Bacteria;D_1__Firmicutes;D_2__Clostridia;D_3__Clostridiales;D_4__Ruminococcaceae;D_5__Incertae Sedis;D_6__uncultured Firmicutes bacterium	26	3	282	1
D_0__Bacteria;D_1__Firmicutes;D_2__Clostridia;D_3__Clostridiales	0	0	282	0
